# Supplementary material for: A framework for seasonal variations of hydrological model parameters: impact on model results and response to dynamic catchment characteristics
Source: Copernicus journal article supplement (doi:10.5194/hess-24-5859-2020), 2020-12-08
Supplement: Supplementary file 2 [file hess-24-5859-2020-supplement.zip]

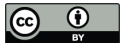

## *Supplement of*

# **A framework for seasonal variations of hydrological model parameters: impact on model results and response to dynamic catchment characteristics**

**Tian Lan et al.**

*Correspondence to:* Kairong Lin ([linkr@mail.sysu.eu.cn](mailto:linkr@mail.sysu.eu.cn))

- [hess-24-5859-2020-supplement-title-page.pdf](#)
- Supplement
  - Codes
    - \* 01 Predictors
    - \* 02 Correlation-MIC
    - \* 03 PCA
    - \* 04 FCM
    - \* 05 Calibration
    - \* 06 State variables and fluxes
    - \* 07 Violin plots
    - \* 08 Parallel Coordinates plots
    - \* 09 Correlations\_scatterplots
  - Supporting Information.pdf

The copyright of individual parts of the supplement might differ from the CC BY 4.0 License.
